# Supplementary material for: What Are the Different Phenotypes of Inflammatory Bowel Disease in Asia?
Source: PubMed Central journal article supplement — Gut Liver. 2022 Feb 11;16(5):676–85. doi: 10.5009/gnl210385 (PMC9474490; doi:10.5009/gnl210385), 2022-02-11
Supplement: gnl-16-5-676-supple.pdf [file gnl-16-5-676-supple.pdf]

**Supplementary Table 1.** Incidence and Prevalence of Inflammatory Bowel Disease in Asian Countries

| Asian countries                               | Incidence rate (n/100,000 patients) |             |           | Prevalence rate (n/100,000 patients) |              |              |
|-----------------------------------------------|-------------------------------------|-------------|-----------|--------------------------------------|--------------|--------------|
|                                               | IBD                                 | UC          | CD        | IBD                                  | UC           | CD           |
| ACCESS cohort (ref. 4/ref. 5)*                | 1.37/1.60                           | 0.76/1.01   | 0.54/0.56 | -                                    | -            | -            |
| Mainland China (Chengdu)                      | 0.58/0.58                           | 0.43/0.43   | 0.14/0.14 | -                                    | -            | -            |
| Mainland China (Daqing)                       | -/2.01                              | -/1.86      | -/0.15    | -                                    | -            | -            |
| Mainland China (Guangzhou)                    | 3.44/3.64                           | 2.22/2.29   | 1.22/1.36 | -                                    | -            | -            |
| Mainland China (Kunming)                      | -/1.26                              | -/1.19      | -/0.08    | -                                    | -            | -            |
| Mainland China (Wuhan)                        | -/2.15                              | -/1.59      | -/0.56    | -                                    | -            | -            |
| Mainland China (Xian)                         | 0.54/0.54                           | 0.42/0.47   | 0.07/0.07 | -                                    | -            | -            |
| Mainland China (Xiangshan)                    | -/1.47                              | -/1.07      | -/0.40    | -                                    | -            | -            |
| Hong Kong                                     | 3.06/2.98                           | 1.66/1.72   | 1.31/1.27 | -                                    | -            | -            |
| Indonesia                                     | 0.88/0.77                           | 0.55/0.49   | 0.33/0.27 | -                                    | -            | -            |
| Macau                                         | 2.20/2.40                           | 1.00/1.60   | 0.60/0.80 | -                                    | -            | -            |
| Malaysia                                      | 0.94/0.76                           | 0.59/0.59   | 0.24/0.18 | -                                    | -            | -            |
| Singapore                                     | 1.06/1.14                           | 0.61/0.70   | 0.40/0.44 | -                                    | -            | -            |
| Sri Lanka                                     | 1.59/1.68                           | 0.95/1.16   | 0.59/0.52 | -                                    | -            | -            |
| Thailand (Chiangmai)                          | 0.67/0.58                           | 0.36/0.30   | 0.30/0.27 | -                                    | -            | -            |
| Thailand (Bangkok)                            | 0.63/0.63                           | 0.28/0.29   | 0.35/0.34 | -                                    | -            | -            |
| Brunei                                        | -/0.49                              | -/0.24      | -/0.24    | -                                    | -            | -            |
| Philippines                                   | -/0.43                              | -/0.29      | -/0.14    | -                                    | -            | -            |
| Taiwan                                        | -/1.01                              | -/0.71      | -/0.31    | -                                    | -            | -            |
| Korea (1986–2015) <sup>6</sup>                | 3.95                                | 2.89        | 1.06      | 108.35 (2015)                        | 76.66 (2015) | 31.59 (2015) |
| (1986–2005) <sup>19</sup>                     | -                                   | 1.51        | 0.53      | -                                    | 30.87 (2005) | 11.24 (2005) |
| Japan (2014) <sup>16</sup>                    | -                                   | -           | -         | -                                    | 172.9        | 55.6         |
| (1986/1998) <sup>20</sup>                     | -                                   | -           | 0.60/1.20 | -                                    | -            | 2.9/13.5     |
| Mainland China (Wuhan, 2010) <sup>7</sup>     | 1.96                                | 0.51        | 1.45      | -                                    | -            | -            |
| Mainland China (Zhongshan, 2011) <sup>8</sup> | 3.44                                | 1.22        | 2.22      | -                                    | -            | -            |
| Taiwan (1998/2008) <sup>10</sup>              | -                                   | 0.61/0.94   | 0.19/0.24 | -                                    | 0.61/7.62    | 0.19/1.78    |
| (1998–2010) <sup>11</sup>                     | -                                   | 0.80        | 0.19      | -                                    | 4.59         | 1.05         |
| (2001/2015) <sup>12</sup>                     | 0.72/1.42                           | 0.54/0.95   | 0.17/0.47 | 9.5                                  | 2.1/12.8     | 0.6/3.9      |
| Lebanon (2004) <sup>13</sup>                  | -                                   | 4.1         | 1.4       | -                                    | 106.2        | 53.1         |
| Kuwait (1985–1999) <sup>14</sup>              | -                                   | 2.8         | -         | -                                    | -            | -            |
| Israel (1987/1997) <sup>15</sup>              | -                                   | 5.04        | -         | -                                    | 121.0/167.2  | -            |
| Kazakhstan (2007) <sup>17</sup>               | -                                   | -           | -         | 113.9                                | 84.4         | 29.5         |
| Turkey (1998–2001) <sup>18</sup>              | -                                   | 0.59 (2001) | -         | -                                    | 4.9          | -            |
| Singapore (1992/2004) <sup>21</sup>           | -                                   | -           | -         | -                                    | -            | 1.3/7.2      |
| Hong Kong (1997/2006) <sup>22</sup>           | -                                   | 0.34/0.37   | -         | -                                    | 2.26/6.30    | -            |

IBD, inflammatory bowel disease; UC, ulcerative colitis; CD, Crohn's disease; ACCESS, Asia-Pacific Crohn's and Colitis Epidemiologic Study; ref., reference number.

\*ACCESS cohort was first reported with data<sup>4</sup> between April 1, 2011 and March 31, 2012 from 8 countries and updated with data<sup>5</sup> between 2011 and 2013 from 13 countries.
